# Supplementary material
Source: PubMed Central journal article supplement (PMC2098845)
Supplement: pcbi.0030215.sg002.pdf [file pcbi.0030215.sg002.pdf]

| No. | Sequence-set | Motif#                                                                              | <i>p</i> -value | Match to literature |
|-----|--------------|-------------------------------------------------------------------------------------|-----------------|---------------------|
| 1   | ABF1_YPD     |    | 0               | Yes                 |
| 2   | ACE2_YPD     |    | 0               | No*                 |
| 3   | AFT2_H2O2Hi  |    | 0               | Yes*                |
| 4   | AFT2_H2O2Lo  |    | 0               | Yes                 |
| 5   | BAS1_YPD     |   | 0               | Yes                 |
| 6   | CBF1_SM      |  | 0               | Yes                 |
| 7   | CBF1_YPD     |  | 0               | Yes                 |
| 8   | CIN5_YPD     |  | 0               | Yes                 |
| 9   | DAL81_RAPA   |  | 0               | No                  |
| 10  | FKH1_YPD     |  | 0               | Yes                 |

| No. | Sequence-set | Motif                                                                               | <i>p</i> -value | Match to literature |
|-----|--------------|-------------------------------------------------------------------------------------|-----------------|---------------------|
| 11  | FKH2_H2O2Hi  |    | 0               | Yes                 |
| 12  | FKH2_YPD     |    | 0               | Yes                 |
| 13  | GCN4_RAPA    |    | 0               | Yes                 |
| 14  | GCN4_SM      |    | 0               | Yes                 |
| 15  | GCN4_YPD     |   | 0               | Yes                 |
| 16  | HAP1_YPD     |  | 0               | Yes                 |
| 17  | HAP4_YPD     |  | 0               | Yes                 |
| 18  | HSF1_H2O2Lo  |  | 0               | Yes                 |
| 19  | INO2_YPD     |  | 0               | Yes                 |
| 20  | INO4_YPD     |  | 0               | Yes                 |

| No. | Sequence-set | Motif                                                                               | <i>p</i> -value | Match to literature |
|-----|--------------|-------------------------------------------------------------------------------------|-----------------|---------------------|
| 21  | MBP1_H2O2Hi  |    | 0               | Yes                 |
| 22  | MBP1_H2O2Lo  |    | 0               | Yes                 |
| 23  | MBP1_YPD     |    | 0               | Yes                 |
| 24  | NRG1_H2O2Hi  |    | 0               | Yes                 |
| 25  | PDR1_YPD     |   | 0               | No*                 |
| 26  | RAP1_YPD     |  | 0               | Yes                 |
| 27  | RCS1_H2O2Hi  |  | 0               | Yes                 |
| 28  | RCS1_H2O2Lo  |  | 0               | Yes                 |
| 29  | REB1_H2O2Hi  |  | 0               | Yes                 |
| 30  | REB1_H2O2Lo  |  | 0               | Yes                 |

| No. | Sequence-set | Motif                                                                               | <i>p</i> -value | Match to literature |
|-----|--------------|-------------------------------------------------------------------------------------|-----------------|---------------------|
| 31  | REB1_YPD     |    | 0               | Yes                 |
| 32  | RPN4_H2O2Lo  |    | 0               | Yes                 |
| 33  | SKN7_H2O2Hi  |    | 0               | Yes                 |
| 34  | SKN7_H2O2Lo  |    | 0               | Yes                 |
| 35  | SKN7_YPD     |   | 0               | Yes                 |
| 36  | SUM1_YPD     |  | 0               | Yes                 |
| 37  | SWI4_YPD     |  | 0               | Yes                 |
| 38  | SWI6_YPD     |  | 0               | Yes                 |
| 39  | TYE7_YPD     |  | 0               | Yes                 |
| 40  | UME6_H2O2Hi  |  | 0               | Yes                 |

| No. | Sequence-set | Motif                                                                               | <i>p</i> -value | Match to literature |
|-----|--------------|-------------------------------------------------------------------------------------|-----------------|---------------------|
| 41  | UME6_YPD     |    | 0               | Yes                 |
| 42  | YAP7_H2O2Hi  |    | 0               | Yes                 |
| 43  | YAP7_H2O2Lo  |    | 0               | Yes                 |
| 44  | STE12_BUT14  |    | 2.8866e-15      | No**                |
| 45  | MCM1_Alpha   |   | 9.881e-15       | Yes                 |
| 46  | STE12_Alpha  |  | 2.8977e-14      | Yes                 |
| 47  | HSF1_H2O2Hi  |  | 1.5909e-13      | Yes                 |
| 48  | RTG3_H2O2Hi  |  | 1.5569e-12      | No                  |
| 49  | GAL4_YPD     |  | 3.7348e-12      | No*                 |
| 50  | PHO4_Pi-     |  | 4.6896e-12      | Yes                 |

| No. | Sequence-set | Motif                                                                               | <i>p</i> -value | Match to literature |
|-----|--------------|-------------------------------------------------------------------------------------|-----------------|---------------------|
| 51  | RPH1_H2O2Hi  |    | 1.7833e-11      | No*                 |
| 52  | ASH1_BUT14   |    | 3.3913e-11      | No                  |
| 53  | YAP1_H2O2Lo  |    | 8.5543e-11      | Yes                 |
| 54  | CIN5_H2O2Lo  |    | 1.0909e-10      | Yes                 |
| 55  | SKO1_YPD     |   | 1.6359e-10      | Yes                 |
| 56  | SMP1_YPD     |  | 8.1032e-10      | No*                 |
| 57  | BAS1_SM      |  | 8.4863e-10      | Yes                 |
| 58  | YAP5_YPD     |  | 1.561e-09       | No*                 |
| 59  | SWI5_YPD     |  | 1.8089e-09      | No*                 |
| 60  | NRG1_YPD     |  | 4.9181e-09      | No                  |

| No. | Sequence-set | Motif                                                                               | <i>p</i> -value | Match to literature |
|-----|--------------|-------------------------------------------------------------------------------------|-----------------|---------------------|
| 61  | CAD1_YPD     |    | 7.8107e-09      | Yes                 |
| 62  | LEU3_SM      |    | 1.009e-08       | Yes                 |
| 63  | SUT1_YPD     |    | 1.4191e-08      | No                  |
| 64  | GLN3_YPD     |    | 5.9425e-08      | No                  |
| 65  | GLN3_RAPA    |   | 6.5648e-08      | Yes                 |
| 66  | XBP1_H2O2Lo  |  | 9.1032e-08      | No                  |
| 67  | STB5_YPD     |  | 2.7928e-07      | Yes                 |
| 68  | ARR1_YPD     |  | 2.9071e-07      | No*                 |
| 69  | STE12_YPD    |  | 3.1672e-07      | Yes                 |
| 70  | MET31_SM     |  | 1.8285e-06      | No                  |

| No. | Sequence-set | Motif                                                                               | <i>p</i> -value | Match to literature |
|-----|--------------|-------------------------------------------------------------------------------------|-----------------|---------------------|
| 71  | YAP1_YPD     |    | 3.3232e-06      | Yes                 |
| 72  | MET32_SM     |    | 5.5417e-06      | No                  |
| 73  | YAP6_H2O2Lo  |    | 5.5572e-06      | No                  |
| 74  | DAL82_YPD    |    | 7.7969e-06      | No                  |
| 75  | HAC1_YPD     |   | 9.5379e-06      | Yes                 |
| 76  | PUT3_YPD     |  | 1.176e-05       | No                  |
| 77  | MET32_YPD    |  | 1.4597e-05      | No                  |
| 78  | ROX1_H2O2Hi  |  | 1.5344e-05      | No                  |
| 79  | STE12_BUT90  |  | 1.5651e-05      | Yes                 |
| 80  | GLN3_SM      |  | 1.5837e-05      | No                  |



| No. | Sequence-set | Motif                                                                               | <i>p</i> -value | Match to literature |
|-----|--------------|-------------------------------------------------------------------------------------|-----------------|---------------------|
| 81  | FKH2_H2O2Lo  |    | 2.9307e-05      | Yes                 |
| 82  | HAP5_SM      |    | 3.894e-05       | No                  |
| 83  | CIN5_H2O2Hi  |    | 4.7852e-05      | Yes                 |
| 84  | MSN2_H2O2Lo  |    | 5.6921e-05      | No                  |
| 85  | MSN2_Acid    |   | 6.071e-05       | No                  |
| 86  | MAC1_YPD     |  | 9.3389e-05      | Yes                 |
| 87  | TEC1_Alpha   |  | 0.00015144      | No**                |
| 88  | TEC1_BUT14   |  | 0.00015453      | No                  |
| 89  | RPH1_YPD     |  | 0.00019026      | No                  |
| 90  | GCR1_YPD     |  | 0.00022014      | Yes                 |

| No. | Sequence-set | Motif                                                                               | <i>p</i> -value | Match to literature |
|-----|--------------|-------------------------------------------------------------------------------------|-----------------|---------------------|
| 91  | LEU3_YPD     |    | 0.00022692      | Yes                 |
| 92  | HAP3_YPD     |    | 0.00024498      | Yes                 |
| 93  | DAL82_SM     |    | 0.00043324      | Yes                 |
| 94  | DAL82_RAPA   |    | 0.00052712      | Yes                 |
| 95  | RTG3_RAPA    |   | 0.00059191      | No                  |
| 96  | MSN2_H2O2Hi  |  | 0.00067082      | No                  |
| 97  | GZF3_RAPA    |  | 0.00071649      | No                  |
| 98  | MSN4_YPD     |  | 0.00098603      | No                  |
| 99  | NRG1_H2O2Lo  |  | 0.0010865       | No                  |
| 100 | STP1_YPD     |  | 0.0012159       | No                  |

| No. | Sequence-set | Motif                                                                               | <i>p</i> -value | Match to literature |
|-----|--------------|-------------------------------------------------------------------------------------|-----------------|---------------------|
| 101 | YAP6_H2O2Hi  |    | 0.0012971       | No                  |
| 102 | GAT1_RAPA    |    | 0.0014653       | Yes                 |
| 103 | RTG1_LSM     |    | 0.0014687       | No                  |
| 104 | RPH1_LSM     |    | 0.0015045       | No                  |
| 105 | ADR1_YPD     |   | 0.0015052       | No                  |
| 106 | UGA3_SM      |  | 0.0015247       | No                  |
| 107 | RTG3_YPD     |  | 0.0015802       | No                  |
| 108 | HAP2_YPD     |  | 0.0026357       | No                  |
| 109 | YOX1_YPD     |  | 0.0028295       | No                  |
| 110 | RPN4_YPD     |  | 0.0028328       | No                  |

| No. | Sequence-set | Motif                                                                               | <i>p</i> -value | Match to literature |
|-----|--------------|-------------------------------------------------------------------------------------|-----------------|---------------------|
| 111 | CAD1_SM      |    | 0.0030512       | Yes                 |
| 112 | MET31_YPD    |    | 0.004237        | No                  |
| 113 | HAP2_RAPA    |    | 0.0052141       | Yes                 |
| 114 | MSN4_H2O2Hi  |    | 0.0055192       | No                  |
| 115 | TEC1_YPD     |   | 0.005915        | No                  |
| 116 | DAL80_RAPA   |  | 0.0060038       | No                  |
| 117 | MOT3_YPD     |  | 0.0063403       | No                  |
| 118 | MSN4_H2O2Lo  |  | 0.0078024       | No                  |
| 119 | GAL4_RAFF    |  | 0.010915        | No                  |
| 120 | UGA3_RAPA    |  | 0.012632        | No                  |

| No. | Sequence-set | Motif                                                                               | <i>p</i> -value | Match to literature |
|-----|--------------|-------------------------------------------------------------------------------------|-----------------|---------------------|
| 121 | RTG3_SM      |    | 0.014349        | No                  |
| 122 | AZF1_YPD     |    | 0.016029        | No                  |
| 123 | MCM1_YPD     |    | 0.018747        | Yes                 |
| 124 | ROX1_YPD     |    | 0.023021        | No                  |
| 125 | RLM1_YPD     |   | 0.023389        | No                  |
| 126 | ROX1_H2O2Lo  |  | 0.024433        | No                  |
| 127 | MOT3_SM      |  | 0.024816        | No                  |
| 128 | MAC1_H2O2Hi  |  | 0.025741        | Yes                 |
| 129 | AFT2_YPD     |  | 0.026932        | No                  |
| 130 | YAP6_YPD     |  | 0.026955        | No                  |

| No. | Sequence-set  | Motif                                                                               | <i>p</i> -value | Match to literature |
|-----|---------------|-------------------------------------------------------------------------------------|-----------------|---------------------|
| 131 | DAL81_YPD     |    | 0.02843         | No                  |
| 132 | YAP3_YPD      |    | 0.03141         | No                  |
| 133 | PHO4_YPD      |    | 0.049087        | No                  |
| 134 | RCS1_SM       |    | 0.060689        | No                  |
| 135 | RIM101_H2O2Hi |   | 0.076127        | No                  |
| 136 | PDR3_YPD      |  | 0.077626        | No                  |
| 137 | GAL4_GAL      |  | 0.079778        | No                  |
| 138 | RTG1_RAPA     |  | 0.081778        | No                  |
| 139 | HAP4_H2O2Lo   |  | 0.083529        | No                  |
| 140 | MSN2_RAPA     |  | 0.084886        | No                  |

| No. | Sequence-set | Motif                                                                               | <i>p</i> -value | Match to literature |
|-----|--------------|-------------------------------------------------------------------------------------|-----------------|---------------------|
| 141 | GZF3_H2O2Hi  |    | 0.11514         | No                  |
| 142 | RCS1_YPD     |    | 0.11816         | No                  |
| 143 | GAT1_SM      |    | 0.13297         | No                  |
| 144 | STP1_SM      |    | 0.13453         | No                  |
| 145 | PUT3_SM      |   | 0.13613         | No                  |
| 146 | DAL80_YPD    |  | 0.17524         | No                  |
| 147 | ADR1_HEAT    |  | 0.20828         | No                  |
| 148 | ZAP1_YPD     |  | 0.21862         | No                  |
| 149 | MSN4_Acid    |  | 0.22329         | Yes                 |
| 150 | YHP1_YPD     |  | 0.24397         | No                  |

| No. | Sequence-set | Motif                                                                               | $p$ -value | Match to literature |
|-----|--------------|-------------------------------------------------------------------------------------|------------|---------------------|
| 151 | SIP4_SM      |    | 0.26483    | No                  |
| 152 | SIP4_YPD     |    | 0.26673    | No                  |
| 153 | HAP5_YPD     |    | 0.2957     | No                  |
| 154 | PDR1_H2O2Lo  |    | 0.37959    | No                  |
| 155 | YAP5_H2O2Hi  |   | 0.41041    | No                  |
| 156 | MSN4_RAPA    |  | 0.66843    | No                  |

**Figure S2. Motifs learned by PRIORITY-DN on the 156 sequence-sets with known motifs.** The motifs are ranked according to their  $p$ -values. The  $p$ -values are computed from the normal distribution of scores learned on random sequence-sets with the same cardinality.

\*We disregard motifs that resemble the yeast repeat TGTGTGTG or CACACACA when we compute the precision-recall curve in Figure S3. Although they have a low  $p$ -value, they are not likely to be true motifs. See text for more details.

\*\*As mentioned in the text, the motif learned from Ste12\_BUT14 matches the Tec1 motif, while the motif learned from Tec1\_Alpha matches the Ste12 motif.

#The logos of the motifs were generated using the web based program called WebLogo by Crooks *et al.* (2004).
