# Supplementary material
Source: PubMed Central journal article supplement (PMC2098845)
Supplement: pcbi.0030215.sg004.pdf [file pcbi.0030215.sg004.pdf]

| No. | Sequence-set | Motif#                                                                               | <i>p</i> -value |
|-----|--------------|--------------------------------------------------------------------------------------|-----------------|
| 1   | FHL1_RAPA    |    | 0               |
| 2   | FHL1_SM      |    | 0               |
| 3   | FHL1_YPD     |    | 0               |
| 4   | IME4_YPD     |    | 0*              |
| 5   | MAL33_H2O2Hi |   | 0*              |
| 6   | SFP1_SM      |  | 0               |
| 7   | SNT2_YPD     |  | 0               |
| 8   | YDR026c_YPD  |  | 0               |
| 9   | STB1_YPD     |  | 2.0475e-11      |
| 10  | GAT3_YPD     |  | 9.6814e-10      |

| No. | Sequence-set | Motif                                                                                | <i>p</i> -value |
|-----|--------------|--------------------------------------------------------------------------------------|-----------------|
| 11  | DIG1_Alpha   |    | 7.9782e-09      |
| 12  | YJL206C_YPD  |    | 9.9985e-09      |
| 13  | DIG1_BUT90   |    | 2.6087e-07      |
| 14  | SOK2_BUT14   |    | 2.8795e-07      |
| 15  | PHD1_BUT90   |   | 2.5892e-06      |
| 16  | RFX1_YPD     |  | 2.8015e-06      |
| 17  | CST6_YPD     |  | 6.2154e-06      |
| 18  | ARG81_SM     |  | 1.5214e-05      |
| 19  | DIG1_BUT14   |  | 1.7175e-05      |
| 20  | PHD1_YPD     |  | 2.2941e-05      |

| No. | Sequence-set   | Motif                                                                                | <i>p</i> -value |
|-----|----------------|--------------------------------------------------------------------------------------|-----------------|
| 21  | DAT1_YPD       |    | 2.7442e-05      |
| 22  | RDS1_H2O2Hi    |    | 2.8499e-05      |
| 23  | RME1_YPD       |    | 3.3738e-05      |
| 24  | GCR2_YPD       |    | 5.3452e-05*     |
| 25  | YJL206C_H2O2Hi |   | 5.4521e-05      |
| 26  | PHO2_H2O2Hi    |  | 6.4884e-05      |
| 27  | CHA4_SM        |  | 0.00017939      |
| 28  | MET4_SM        |  | 0.00019246      |
| 29  | GTS1_YPD       |  | 0.00020434      |
| 30  | NDD1_YPD       |  | 0.00034416      |

| No. | Sequence-set | Motif                                                                                | <i>p</i> -value |
|-----|--------------|--------------------------------------------------------------------------------------|-----------------|
| 31  | SFP1_H2O2Lo  |    | 0.00045344      |
| 32  | KSS1_YPD     |    | 0.00050743      |
| 33  | ARO80_SM     |    | 0.00086676      |
| 34  | SRD1_YPD     |    | 0.0013084       |
| 35  | PDC2_YPD     |   | 0.0013111       |
| 36  | STB4_YPD     |  | 0.0022358       |
| 37  | STP4_YPD     |  | 0.0024053       |
| 38  | PIP2_YPD     |  | 0.0025423       |
| 39  | UME1_H2O2Hi  |  | 0.0028082       |
| 40  | ARO80_YPD    |  | 0.0034618       |

| No. | Sequence-set | Motif                                                                                | <i>p</i> -value |
|-----|--------------|--------------------------------------------------------------------------------------|-----------------|
| 41  | PHO2.SM      |    | 0.0036568       |
| 42  | MIG2.YPD     |    | 0.0039971       |
| 43  | CUP9.YPD     |    | 0.0040281       |
| 44  | ASK10.YPD    |    | 0.0046682       |
| 45  | MIG1.YPD     |   | 0.0048861       |
| 46  | FZF1.YPD     |  | 0.0052229*      |
| 47  | OAF1.YPD     |  | 0.0053257       |
| 48  | IME4.H2O2Hi  |  | 0.0070898       |
| 49  | YER130C.YPD  |  | 0.0074195       |
| 50  | MET18.YPD    |  | 0.0097728       |

| No. | Sequence-set | Motif                                                                                | <i>p</i> -value |
|-----|--------------|--------------------------------------------------------------------------------------|-----------------|
| 51  | ARG80_YPD    |    | 0.010513        |
| 52  | IXR1_YPD     |    | 0.011083        |
| 53  | UME1_YPD     |    | 0.011408        |
| 54  | HAL9_YPD     |    | 0.014647        |
| 55  | UPC2_YPD     |   | 0.015817        |
| 56  | HIR3_YPD     |  | 0.018132        |
| 57  | PHO2_YPD     |  | 0.01841         |
| 58  | SPT2_YPD     |  | 0.019389        |
| 59  | MSS11_BUT14  |  | 0.020365        |
| 60  | DIG1_YPD     |  | 0.023323        |

| No. | Sequence-set | Motif                                                                                | <i>p</i> -value |
|-----|--------------|--------------------------------------------------------------------------------------|-----------------|
| 61  | MGA1_YPD     |    | 0.025555        |
| 62  | THI2_Thi-    |    | 0.037419        |
| 63  | HIR1_YPD     |    | 0.038401        |
| 64  | YML081W_YPD  |    | 0.056814        |
| 65  | NDT80_YPD    |   | 0.057773        |
| 66  | WTM1_YPD     |  | 0.062581        |
| 67  | ARG81_YPD    |  | 0.072655        |
| 68  | YRR1_YPD     |  | 0.076884        |
| 69  | WAR1_YPD     |  | 0.09921         |
| 70  | GCR2_SM      |  | 0.10588         |

| No. | Sequence-set | Motif                                                                                | <i>p</i> -value |
|-----|--------------|--------------------------------------------------------------------------------------|-----------------|
| 71  | YFL044C_YPD  |    | 0.1105          |
| 72  | SIG1_H2O2Hi  |    | 0.1285          |
| 73  | MET28_YPD    |    | 0.13216         |
| 74  | HMS2_YPD     |    | 0.13899         |
| 75  | STB2_YPD     |   | 0.17031         |
| 76  | RLR1_YPD     |  | 0.19307         |
| 77  | STP2_YPD     |  | 0.20643         |
| 78  | PPR1_YPD     |  | 0.27217         |
| 79  | SPT23_YPD    |  | 0.27626         |
| 80  | HOG1_YPD     |  | 0.33553         |



| No. | Sequence-set | Motif                                                                              | $p$ -value |
|-----|--------------|------------------------------------------------------------------------------------|------------|
| 81  | HMS1.YPD     |  | 0.33582    |
| 82  | HIR2.YPD     |  | 0.49247    |

**Figure S4. Novel motifs learned by PRIORITY-DN on 82 sequence-sets.** The motifs are ranked according to their  $p$ -values. The  $p$ -values are computed from the normal distribution of scores learned on random sequence-sets with the same cardinality.

\*When we look for motifs with high significance, *i.e.* those having a  $p$ -value less than some cutoff, we disregard motifs that resemble the yeast repeat TGTGTGTG or CACACACA. See text for more details.

#The logos of the motifs were generated using the web based program called WebLogo by Crooks *et al.* (2004).
