# Supplementary material
Source: PubMed Central journal article supplement (PMC2098845)
Supplement: pcbi.0030215.st001.pdf [file pcbi.0030215.st001.pdf]

**Table S1. Comparison of priority using various positional priors with state-of-the-art motif discovery programs.** A ‘1’ in a cell represents a match to the literature consensus of the top-scoring motif learned by the respective program. A ‘0’ represents no match. The programs being compared, along with their shorthand designations, are

- $\mathcal{U}$  : PRIORITY- $\mathcal{U}$ , *i.e.* Gibbs sampling with a uniform positional prior  
 $\mathcal{N}$  : PRIORITY- $\mathcal{N}$ , *i.e.* Gibbs sampling with prior  $\mathcal{N}$ , calculated based on the  $\mathcal{S}_{\mathcal{N}}$  score from the computational predictions of Segal *et al.*  
 $\mathcal{DN}$  : PRIORITY- $\mathcal{DN}$ , *i.e.* Gibbs sampling with prior  $\mathcal{DN}$ , calculated based on the  $\mathcal{S}_{\mathcal{DN}}$  score from the computational predictions of Segal *et al.*  
 $\mathcal{DN}'$  : PRIORITY- $\mathcal{DN}'$ , *i.e.* Gibbs sampling with prior  $\mathcal{DN}'$ , calculated based on the  $\mathcal{S}_{\mathcal{DN}'}$  score from the *in vivo* data of Lee *et al.*  
 $\mathcal{D}$  : PRIORITY- $\mathcal{D}$ , *i.e.* Gibbs sampling with a simplification of prior  $\mathcal{DN}$ , calculated in the absence of nucleosome occupancy data as described in the Discussion  
A : AlignACE  
M : MEME  
MD : MDscan  
M.c : MEME.c, *i.e.* MEME using conservation information  
C : CONVERGE, a conservation based method of Harbison *et al.*  
K : the conservation based method of Kellis *et al.*

| No. | Sequence-set | $\mathcal{U}$ | $\mathcal{N}$ | $\mathcal{DN}$ | $\mathcal{DN}'$ | $\mathcal{D}$ | A | M | MD | M.c | C | K |
|-----|--------------|---------------|---------------|----------------|-----------------|---------------|---|---|----|-----|---|---|
| 1   | ABF1_YPD     | 1             | 1             | 1              | 1               | 1             | 1 | 1 | 0  | 1   | 1 | 1 |
| 2   | ACE2_YPD     | 0             | 0             | 0              | 0               | 0             | 0 | 0 | 0  | 0   | 0 | 1 |
| 3   | ADR1_HEAT    | 0             | 0             | 0              | 0               | 0             | 0 | 0 | 0  | 0   | 0 | 0 |
| 4   | ADR1_YPD     | 0             | 0             | 0              | 0               | 0             | 0 | 0 | 0  | 0   | 0 | 0 |
| 5   | AFT2_H2O2Hi  | 0             | 1             | 1              | 0               | 0             | 0 | 0 | 0  | 0   | 0 | 0 |
| 6   | AFT2_H2O2Lo  | 1             | 1             | 1              | 1               | 1             | 0 | 1 | 1  | 1   | 1 | 0 |
| 7   | AFT2_YPD     | 0             | 0             | 0              | 0               | 0             | 0 | 0 | 0  | 0   | 0 | 0 |
| 8   | ARR1_YPD     | 0             | 0             | 0              | 0               | 0             | 0 | 0 | 0  | 0   | 0 | 0 |
| 9   | ASH1_BUT14   | 0             | 0             | 0              | 0               | 0             | 0 | 0 | 0  | 0   | 0 | 0 |
| 10  | AZF1_YPD     | 0             | 0             | 0              | 0               | 0             | 1 | 1 | 0  | 1   | 1 | 0 |
| 11  | BAS1_SM      | 1             | 1             | 1              | 1               | 1             | 0 | 1 | 0  | 1   | 1 | 1 |
| 12  | BAS1_YPD     | 1             | 1             | 1              | 1               | 1             | 0 | 0 | 1  | 1   | 1 | 1 |
| 13  | CAD1_SM      | 1             | 1             | 1              | 0               | 1             | 0 | 0 | 1  | 1   | 0 | 0 |
| 14  | CAD1_YPD     | 1             | 1             | 1              | 1               | 1             | 0 | 1 | 0  | 1   | 1 | 0 |
| 15  | CBF1_SM      | 1             | 1             | 1              | 1               | 1             | 0 | 0 | 1  | 0   | 1 | 1 |

| No. | Sequence-set | $\mathcal{U}$ | $\mathcal{N}$ | $\mathcal{DN}$ | $\mathcal{DN}'$ | $\mathcal{D}$ | A | M | MD | M.c | C | K |
|-----|--------------|---------------|---------------|----------------|-----------------|---------------|---|---|----|-----|---|---|
| 16  | CBF1_YPD     | 1             | 1             | 1              | 1               | 1             | 1 | 1 | 1  | 1   | 1 | 0 |
| 17  | CIN5_H2O2Hi  | 0             | 0             | 1              | 1               | 0             | 0 | 0 | 0  | 0   | 1 | 0 |
| 18  | CIN5_H2O2Lo  | 1             | 0             | 1              | 1               | 1             | 0 | 0 | 0  | 0   | 1 | 1 |
| 19  | CIN5_YPD     | 0             | 0             | 1              | 1               | 1             | 0 | 0 | 1  | 0   | 0 | 0 |
| 20  | DAL80_RAPA   | 0             | 0             | 0              | 0               | 0             | 0 | 0 | 0  | 0   | 0 | 0 |
| 21  | DAL80_YPD    | 0             | 0             | 0              | 0               | 0             | 0 | 0 | 0  | 0   | 0 | 0 |
| 22  | DAL81_RAPA   | 0             | 0             | 0              | 0               | 0             | 0 | 0 | 0  | 0   | 0 | 0 |
| 23  | DAL81_YPD    | 0             | 0             | 0              | 0               | 0             | 0 | 0 | 0  | 0   | 0 | 0 |
| 24  | DAL82_RAPA   | 0             | 0             | 1              | 0               | 0             | 0 | 0 | 0  | 0   | 1 | 0 |
| 25  | DAL82.SM     | 0             | 1             | 1              | 0               | 0             | 0 | 0 | 0  | 1   | 1 | 0 |
| 26  | DAL82_YPD    | 0             | 0             | 0              | 0               | 0             | 0 | 0 | 1  | 0   | 0 | 1 |
| 27  | FKH1_YPD     | 1             | 1             | 1              | 1               | 1             | 1 | 1 | 1  | 1   | 1 | 1 |
| 28  | FKH2_H2O2Hi  | 1             | 1             | 1              | 1               | 1             | 1 | 0 | 1  | 1   | 1 | 1 |
| 29  | FKH2_H2O2Lo  | 1             | 1             | 1              | 1               | 1             | 1 | 1 | 0  | 1   | 1 | 0 |
| 30  | FKH2_YPD     | 1             | 1             | 1              | 1               | 1             | 1 | 0 | 1  | 1   | 1 | 1 |
| 31  | GAL4.GAL     | 0             | 0             | 0              | 0               | 0             | 0 | 0 | 0  | 0   | 0 | 1 |
| 32  | GAL4_RAFF    | 0             | 0             | 0              | 0               | 0             | 0 | 0 | 0  | 0   | 0 | 1 |
| 33  | GAL4_YPD     | 0             | 0             | 0              | 0               | 0             | 0 | 0 | 0  | 1   | 0 | 1 |
| 34  | GAT1_RAPA    | 0             | 0             | 1              | 1               | 0             | 0 | 0 | 0  | 1   | 0 | 1 |
| 35  | GAT1.SM      | 0             | 0             | 0              | 1               | 0             | 0 | 0 | 0  | 0   | 1 | 0 |
| 36  | GCN4_RAPA    | 1             | 1             | 1              | 1               | 1             | 0 | 1 | 1  | 1   | 1 | 1 |
| 37  | GCN4.SM      | 1             | 1             | 1              | 1               | 1             | 0 | 0 | 1  | 1   | 1 | 1 |
| 38  | GCN4_YPD     | 1             | 1             | 1              | 1               | 1             | 0 | 1 | 1  | 1   | 1 | 1 |
| 39  | GCR1_YPD     | 0             | 0             | 1              | 0               | 0             | 0 | 1 | 1  | 0   | 0 | 0 |
| 40  | GLN3_RAPA    | 1             | 1             | 1              | 1               | 1             | 0 | 1 | 1  | 1   | 1 | 1 |
| 41  | GLN3.SM      | 0             | 0             | 0              | 0               | 0             | 0 | 0 | 0  | 0   | 0 | 0 |
| 42  | GLN3_YPD     | 0             | 0             | 0              | 0               | 0             | 1 | 0 | 1  | 0   | 0 | 0 |
| 43  | GZF3_H2O2Hi  | 0             | 0             | 0              | 0               | 0             | 0 | 0 | 0  | 0   | 0 | 0 |
| 44  | GZF3_RAPA    | 0             | 0             | 0              | 0               | 0             | 0 | 0 | 0  | 0   | 0 | 0 |
| 45  | HAC1_YPD     | 1             | 1             | 1              | 1               | 1             | 0 | 1 | 1  | 1   | 0 | 0 |
| 46  | HAP1_YPD     | 0             | 0             | 1              | 1               | 1             | 0 | 0 | 0  | 0   | 1 | 1 |
| 47  | HAP2_RAPA    | 0             | 0             | 1              | 1               | 1             | 0 | 0 | 0  | 0   | 0 | 0 |
| 48  | HAP2_YPD     | 0             | 0             | 0              | 0               | 0             | 0 | 0 | 0  | 0   | 0 | 1 |
| 49  | HAP3_YPD     | 0             | 1             | 1              | 1               | 0             | 0 | 0 | 0  | 0   | 0 | 0 |

| No. | Sequence-set | $\mathcal{U}$ | $\mathcal{N}$ | $\mathcal{DN}$ | $\mathcal{DN}'$ | $\mathcal{D}$ | A | M | MD | M_c | C | K |
|-----|--------------|---------------|---------------|----------------|-----------------|---------------|---|---|----|-----|---|---|
| 50  | HAP4_H2O2Lo  | 0             | 0             | 0              | 0               | 0             | 0 | 0 | 0  | 0   | 0 | 0 |
| 51  | HAP4_YPD     | 1             | 1             | 1              | 1               | 1             | 0 | 1 | 0  | 1   | 1 | 0 |
| 52  | HAP5_SM      | 0             | 0             | 0              | 0               | 0             | 0 | 0 | 0  | 0   | 0 | 0 |
| 53  | HAP5_YPD     | 0             | 0             | 0              | 0               | 0             | 0 | 0 | 0  | 0   | 0 | 0 |
| 54  | HSF1_H2O2Hi  | 0             | 0             | 1              | 1               | 1             | 0 | 0 | 1  | 1   | 1 | 1 |
| 55  | HSF1_H2O2Lo  | 1             | 0             | 1              | 1               | 1             | 0 | 1 | 1  | 1   | 1 | 1 |
| 56  | INO2_YPD     | 1             | 1             | 1              | 1               | 1             | 0 | 1 | 1  | 1   | 1 | 1 |
| 57  | INO4_YPD     | 1             | 1             | 1              | 1               | 1             | 0 | 1 | 1  | 1   | 1 | 1 |
| 58  | LEU3_SM      | 1             | 1             | 1              | 1               | 1             | 0 | 1 | 1  | 1   | 1 | 1 |
| 59  | LEU3_YPD     | 0             | 1             | 1              | 1               | 1             | 0 | 0 | 1  | 0   | 0 | 1 |
| 60  | MAC1_H2O2Hi  | 0             | 0             | 1              | 0               | 0             | 0 | 0 | 1  | 0   | 0 | 0 |
| 61  | MAC1_YPD     | 0             | 0             | 1              | 1               | 0             | 0 | 0 | 0  | 0   | 0 | 0 |
| 62  | MBP1_H2O2Hi  | 1             | 1             | 1              | 1               | 1             | 0 | 1 | 1  | 1   | 1 | 1 |
| 63  | MBP1_H2O2Lo  | 1             | 1             | 1              | 1               | 1             | 0 | 1 | 1  | 1   | 1 | 1 |
| 64  | MBP1_YPD     | 0             | 1             | 1              | 1               | 1             | 0 | 0 | 1  | 0   | 1 | 1 |
| 65  | MCM1_Alpha   | 0             | 1             | 1              | 1               | 1             | 1 | 1 | 1  | 1   | 1 | 0 |
| 66  | MCM1_YPD     | 0             | 1             | 1              | 1               | 1             | 0 | 1 | 1  | 1   | 1 | 0 |
| 67  | MET31_SM     | 0             | 0             | 0              | 0               | 0             | 0 | 0 | 0  | 0   | 0 | 0 |
| 68  | MET31_YPD    | 0             | 0             | 0              | 0               | 0             | 0 | 0 | 0  | 0   | 0 | 0 |
| 69  | MET32_SM     | 0             | 0             | 0              | 0               | 0             | 0 | 0 | 0  | 0   | 0 | 0 |
| 70  | MET32_YPD    | 0             | 0             | 0              | 0               | 0             | 0 | 0 | 0  | 0   | 0 | 0 |
| 71  | MOT3_SM      | 0             | 0             | 0              | 0               | 0             | 0 | 0 | 0  | 0   | 0 | 0 |
| 72  | MOT3_YPD     | 0             | 0             | 0              | 0               | 0             | 0 | 0 | 0  | 0   | 0 | 0 |
| 73  | MSN2_Acid    | 0             | 0             | 0              | 0               | 0             | 0 | 0 | 0  | 0   | 0 | 0 |
| 74  | MSN2_H2O2Hi  | 0             | 0             | 0              | 0               | 1             | 0 | 0 | 1  | 0   | 0 | 0 |
| 75  | MSN2_H2O2Lo  | 0             | 0             | 0              | 0               | 0             | 0 | 0 | 0  | 0   | 0 | 0 |
| 76  | MSN2_RAPA    | 0             | 0             | 0              | 0               | 0             | 0 | 0 | 0  | 0   | 0 | 0 |
| 77  | MSN4_Acid    | 0             | 1             | 1              | 0               | 0             | 0 | 0 | 0  | 0   | 0 | 0 |
| 78  | MSN4_H2O2Hi  | 0             | 0             | 0              | 0               | 0             | 0 | 0 | 0  | 0   | 0 | 0 |
| 79  | MSN4_H2O2Lo  | 0             | 0             | 0              | 0               | 0             | 0 | 0 | 0  | 0   | 0 | 0 |
| 80  | MSN4_RAPA    | 0             | 0             | 0              | 0               | 0             | 0 | 0 | 0  | 0   | 0 | 0 |
| 81  | MSN4_YPD     | 0             | 0             | 0              | 0               | 0             | 0 | 0 | 0  | 0   | 0 | 0 |
| 82  | NRG1_H2O2Hi  | 1             | 1             | 1              | 1               | 1             | 0 | 0 | 1  | 1   | 1 | 0 |
| 83  | NRG1_H2O2Lo  | 0             | 0             | 0              | 0               | 0             | 0 | 0 | 0  | 0   | 0 | 0 |

| No. | Sequence-set  | $\mathcal{U}$ | $\mathcal{N}$ | $\mathcal{DN}$ | $\mathcal{DN}'$ | $\mathcal{D}$ | A | M | MD | M_c | C | K |
|-----|---------------|---------------|---------------|----------------|-----------------|---------------|---|---|----|-----|---|---|
| 84  | NRG1_YPD      | 0             | 0             | 0              | 0               | 0             | 0 | 0 | 0  | 0   | 0 | 0 |
| 85  | PDR1_H2O2Lo   | 0             | 0             | 0              | 0               | 0             | 0 | 0 | 0  | 0   | 0 | 0 |
| 86  | PDR1_YPD      | 0             | 0             | 0              | 0               | 0             | 0 | 0 | 0  | 0   | 0 | 0 |
| 87  | PDR3_YPD      | 0             | 0             | 0              | 0               | 0             | 0 | 0 | 0  | 0   | 0 | 0 |
| 88  | PHO4_Pi-      | 1             | 1             | 1              | 1               | 1             | 0 | 1 | 1  | 1   | 1 | 1 |
| 89  | PHO4_YPD      | 0             | 0             | 0              | 0               | 0             | 0 | 0 | 0  | 0   | 0 | 0 |
| 90  | PUT3_SM       | 0             | 0             | 0              | 0               | 0             | 0 | 0 | 0  | 0   | 0 | 0 |
| 91  | PUT3_YPD      | 0             | 0             | 0              | 0               | 0             | 0 | 1 | 0  | 1   | 0 | 0 |
| 92  | RAP1_YPD      | 1             | 1             | 1              | 1               | 1             | 1 | 1 | 1  | 1   | 1 | 1 |
| 93  | RCS1_H2O2Hi   | 1             | 1             | 1              | 1               | 1             | 0 | 1 | 1  | 1   | 1 | 0 |
| 94  | RCS1_H2O2Lo   | 1             | 1             | 1              | 1               | 1             | 0 | 0 | 0  | 0   | 1 | 1 |
| 95  | RCS1_SM       | 0             | 0             | 0              | 0               | 0             | 0 | 0 | 0  | 0   | 0 | 0 |
| 96  | RCS1_YPD      | 0             | 0             | 0              | 0               | 0             | 0 | 0 | 0  | 0   | 0 | 0 |
| 97  | REB1_H2O2Hi   | 1             | 1             | 1              | 1               | 1             | 1 | 1 | 1  | 1   | 1 | 1 |
| 98  | REB1_H2O2Lo   | 1             | 1             | 1              | 1               | 1             | 0 | 0 | 0  | 0   | 1 | 1 |
| 99  | REB1_YPD      | 1             | 1             | 1              | 1               | 1             | 1 | 1 | 1  | 1   | 1 | 1 |
| 100 | RIM101_H2O2Hi | 0             | 0             | 0              | 0               | 0             | 0 | 0 | 0  | 0   | 0 | 0 |
| 101 | RLM1_YPD      | 0             | 0             | 0              | 0               | 0             | 0 | 0 | 0  | 0   | 0 | 0 |
| 102 | ROX1_H2O2Hi   | 0             | 0             | 0              | 0               | 0             | 0 | 0 | 0  | 0   | 0 | 0 |
| 103 | ROX1_H2O2Lo   | 0             | 0             | 0              | 0               | 0             | 0 | 0 | 0  | 0   | 0 | 0 |
| 104 | ROX1_YPD      | 0             | 0             | 0              | 0               | 0             | 0 | 0 | 0  | 0   | 0 | 0 |
| 105 | RPH1_H2O2Hi   | 0             | 0             | 0              | 0               | 0             | 0 | 0 | 0  | 0   | 0 | 0 |
| 106 | RPH1_SM       | 0             | 0             | 0              | 0               | 0             | 0 | 0 | 0  | 0   | 0 | 0 |
| 107 | RPH1_YPD      | 0             | 0             | 0              | 0               | 0             | 0 | 0 | 0  | 0   | 0 | 0 |
| 108 | RPN4_H2O2Lo   | 1             | 1             | 1              | 1               | 1             | 1 | 1 | 1  | 1   | 1 | 1 |
| 109 | RPN4_YPD      | 0             | 0             | 0              | 0               | 0             | 0 | 0 | 0  | 0   | 0 | 0 |
| 110 | RTG1_RAPA     | 0             | 0             | 0              | 0               | 0             | 0 | 0 | 0  | 0   | 0 | 0 |
| 111 | RTG1_SM       | 0             | 0             | 0              | 0               | 0             | 0 | 0 | 0  | 0   | 0 | 0 |
| 112 | RTG3_H2O2Hi   | 0             | 0             | 0              | 0               | 0             | 0 | 0 | 0  | 0   | 0 | 0 |
| 113 | RTG3_RAPA     | 0             | 0             | 0              | 0               | 0             | 0 | 0 | 0  | 0   | 0 | 0 |
| 114 | RTG3_SM       | 0             | 0             | 0              | 0               | 0             | 0 | 0 | 0  | 0   | 0 | 0 |
| 115 | RTG3_YPD      | 0             | 0             | 0              | 0               | 0             | 0 | 0 | 0  | 0   | 0 | 0 |
| 116 | SIP4_SM       | 0             | 0             | 0              | 0               | 0             | 0 | 0 | 0  | 0   | 0 | 0 |
| 117 | SIP4_YPD      | 0             | 0             | 0              | 0               | 0             | 0 | 0 | 0  | 0   | 0 | 0 |

| No. | Sequence-set | $\mathcal{U}$ | $\mathcal{N}$ | $\mathcal{DN}$ | $\mathcal{DN}'$ | $\mathcal{D}$ | A | M | MD | M_c | C | K |
|-----|--------------|---------------|---------------|----------------|-----------------|---------------|---|---|----|-----|---|---|
| 118 | SKN7_H2O2Hi  | 0             | 0             | 1              | 1               | 0             | 0 | 0 | 1  | 0   | 0 | 0 |
| 119 | SKN7_H2O2Lo  | 0             | 0             | 1              | 1               | 1             | 0 | 0 | 1  | 0   | 0 | 0 |
| 120 | SKN7_YPD     | 1             | 0             | 1              | 1               | 1             | 0 | 0 | 1  | 1   | 0 | 0 |
| 121 | SKO1_YPD     | 0             | 0             | 1              | 1               | 0             | 0 | 0 | 0  | 0   | 1 | 0 |
| 122 | SMP1_YPD     | 0             | 0             | 0              | 0               | 0             | 0 | 0 | 0  | 0   | 0 | 0 |
| 123 | STB5_YPD     | 0             | 1             | 1              | 1               | 1             | 0 | 0 | 1  | 1   | 1 | 1 |
| 124 | STE12_Alpha  | 1             | 0             | 1              | 1               | 1             | 0 | 1 | 1  | 0   | 0 | 1 |
| 125 | STE12_BUT14  | 0             | 0             | 0*             | 0               | 0             | 0 | 0 | 1  | 0   | 0 | 1 |
| 126 | STE12_BUT90  | 0             | 0             | 1              | 1               | 1             | 0 | 0 | 1  | 0   | 1 | 1 |
| 127 | STE12_YPD    | 1             | 0             | 1              | 1               | 1             | 0 | 0 | 1  | 1   | 0 | 1 |
| 128 | STP1_SM      | 0             | 0             | 0              | 0               | 0             | 0 | 0 | 1  | 0   | 0 | 0 |
| 129 | STP1_YPD     | 0             | 0             | 0              | 0               | 0             | 0 | 0 | 0  | 0   | 0 | 0 |
| 130 | SUM1_YPD     | 1             | 1             | 1              | 1               | 1             | 1 | 0 | 1  | 1   | 1 | 0 |
| 131 | SUT1_YPD     | 0             | 0             | 0              | 0               | 0             | 0 | 0 | 0  | 0   | 0 | 0 |
| 132 | SWI4_YPD     | 0             | 1             | 1              | 1               | 1             | 0 | 0 | 0  | 0   | 1 | 1 |
| 133 | SWI5_YPD     | 0             | 0             | 0              | 0               | 0             | 0 | 0 | 0  | 0   | 0 | 1 |
| 134 | SWI6_YPD     | 1             | 1             | 1              | 1               | 1             | 0 | 0 | 0  | 1   | 0 | 0 |
| 135 | TEC1_Alpha   | 0             | 0             | 0**            | 0               | 0             | 0 | 0 | 0  | 0   | 0 | 0 |
| 136 | TEC1_BUT14   | 0             | 0             | 0              | 1               | 0             | 0 | 0 | 1  | 0   | 0 | 0 |
| 137 | TEC1_YPD     | 0             | 0             | 0              | 1               | 1             | 0 | 0 | 0  | 0   | 1 | 1 |
| 138 | TYE7_YPD     | 1             | 1             | 1              | 1               | 1             | 0 | 1 | 1  | 0   | 1 | 1 |
| 139 | UGA3_RAPA    | 0             | 0             | 0              | 0               | 0             | 0 | 0 | 0  | 0   | 0 | 1 |
| 140 | UGA3_SM      | 0             | 0             | 0              | 0               | 0             | 0 | 0 | 0  | 0   | 0 | 0 |
| 141 | UME6_H2O2Hi  | 1             | 1             | 1              | 1               | 1             | 1 | 1 | 1  | 1   | 1 | 1 |
| 142 | UME6_YPD     | 1             | 1             | 1              | 1               | 1             | 1 | 1 | 1  | 1   | 1 | 1 |
| 143 | XBP1_H2O2Lo  | 0             | 0             | 0              | 0               | 0             | 0 | 0 | 0  | 0   | 0 | 0 |
| 144 | YAP1_H2O2Lo  | 1             | 1             | 1              | 1               | 1             | 0 | 0 | 1  | 1   | 1 | 0 |
| 145 | YAP1_YPD     | 1             | 1             | 1              | 1               | 1             | 0 | 0 | 0  | 0   | 1 | 1 |
| 146 | YAP3_YPD     | 0             | 0             | 0              | 0               | 0             | 0 | 0 | 0  | 0   | 0 | 0 |
| 147 | YAP5_H2O2Hi  | 0             | 0             | 0              | 0               | 0             | 0 | 0 | 0  | 0   | 0 | 0 |
| 148 | YAP5_YPD     | 0             | 0             | 0              | 0               | 0             | 0 | 0 | 0  | 0   | 0 | 0 |
| 149 | YAP6_H2O2Hi  | 0             | 0             | 0              | 0               | 0             | 0 | 0 | 0  | 0   | 0 | 0 |
| 150 | YAP6_H2O2Lo  | 0             | 0             | 0              | 0               | 0             | 0 | 0 | 0  | 0   | 0 | 0 |
| 151 | YAP6_YPD     | 0             | 0             | 0              | 0               | 0             | 0 | 0 | 0  | 0   | 0 | 0 |

| No.   | Sequence-set | $\mathcal{U}$ | $\mathcal{N}$ | $\mathcal{DN}$ | $\mathcal{DN}'$ | $\mathcal{D}$ | A  | M  | MD | M.c | C  | K  |
|-------|--------------|---------------|---------------|----------------|-----------------|---------------|----|----|----|-----|----|----|
| 152   | YAP7_H2O2Hi  | 1             | 1             | 1              | 1               | 1             | 0  | 1  | 1  | 1   | 1  | 0  |
| 153   | YAP7_H2O2Lo  | 1             | 1             | 1              | 1               | 1             | 0  | 0  | 1  | 1   | 1  | 1  |
| 154   | YHP1_YPD     | 0             | 0             | 0              | 0               | 0             | 0  | 0  | 0  | 0   | 0  | 0  |
| 155   | YOX1_YPD     | 0             | 0             | 0              | 0               | 0             | 0  | 0  | 0  | 0   | 0  | 0  |
| 156   | ZAP1_YPD     | 0             | 0             | 0              | 0               | 0             | 0  | 1  | 0  | 1   | 1  | 0  |
| Total |              | 46            | 51            | 70             | 66              | 60            | 16 | 35 | 54 | 49  | 56 | 50 |

\*In the paper we show that Ste12 in BUT14 condition is most likely to be a part of a transcriptional complex in the filamentation pathway. Tec1, which is also part of this complex in this condition, is believed to make DNA contact at its consensus motif of **CATTCy**. PRIORITY- $\mathcal{DN}$  finds this motif, correctly detecting the indirect binding of Ste12 to DNA. But since this table is generated with the criterion that the learned motif should match the motif of the profiled TF, which is **ATGAAAC** for Ste12, there is a zero in this cell. Although not shown in this table, programs  $\mathcal{DN}'$ ,  $\mathcal{D}$ , and C also find the Tec1 motif in this sequence-set.

\*\*In the paper we show that Tec1 in Alpha condition is most likely to be a part of a transcriptional complex in the mating pathway. Ste12, which is also part of this complex in this condition, is believed to make DNA contact at its consensus motif of **ATGAAAC**. PRIORITY- $\mathcal{DN}$  finds this motif, correctly detecting the indirect binding of Tec1 to DNA. But since this table is generated with the criterion that the learned motif should match the motif of the profiled TF, which is **CATTCy** for Tec1, there is a zero in this cell. Although not shown in this table, programs MD,  $\mathcal{D}$ , M.c, C, and K also find the Ste12 motif in this sequence-set.
